# Supplementary material for: Saline-enabled self-healing of polyelectrolyte multilayer films
Source: Royal Society of Chemistry journal article supplement (doi:10.1039/c4ra13373k), 2014-12-11

*Electronic Supplementary Information (ESI)*

**Saline-Enabled Self-Healing of Biocompatible Polyelectrolyte Multilayer Films**

*Xiaoxia Hu, Shun Feng\*, Shimei Xu, Jide Wang, and Jie Xu*

**Table S1.** The effect of the outmost layer on the self-healing abilities of assembled multilayer films characterized by the dispersion experiment (n=3)

|                              | Time  | Diffusion diameters / mm |                           | P value <sup>[a]</sup> |
|------------------------------|-------|--------------------------|---------------------------|------------------------|
|                              |       | Original film            | Normal saline healed film |                        |
| PDDA(CMC/PU) <sub>20</sub>   | 5 s   | 2.83±0.13                | 2.78±0.16                 | 7.32×10 <sup>-1</sup>  |
|                              | 30 s  | 2.88±0.11                | 2.80±0.06                 | 3.52×10 <sup>-1</sup>  |
|                              | 2 min | 2.93±0.03                | 2.85±0.04                 | 2.99×10 <sup>-2</sup>  |
|                              | 5 min | 2.96±0.02                | 2.85±0.03                 | 3.82×10 <sup>-3</sup>  |
| PDDA(CMC/PU) <sub>20.5</sub> | 5 s   | 3.05±0.01                | 2.81±0.03                 | 1.28×10 <sup>-4</sup>  |
|                              | 30 s  | 3.09±0.01                | 2.88±0.02                 | 3.52×10 <sup>-5</sup>  |
|                              | 2 min | 3.13±0.02                | 2.90±0.02                 | 5.72×10 <sup>-5</sup>  |
|                              | 5 min | 3.16±0.03                | 2.94±0.02                 | 3.48×10 <sup>-4</sup>  |

[a] calculated by independent-sample *t*-Test (two-tailed) algorithm

**Fig. S1** The healing properties of water with different pHs on a) PDDA(CMC/PU)<sub>20</sub> and b) PDDA(CMC/PU)<sub>20.5</sub> films.

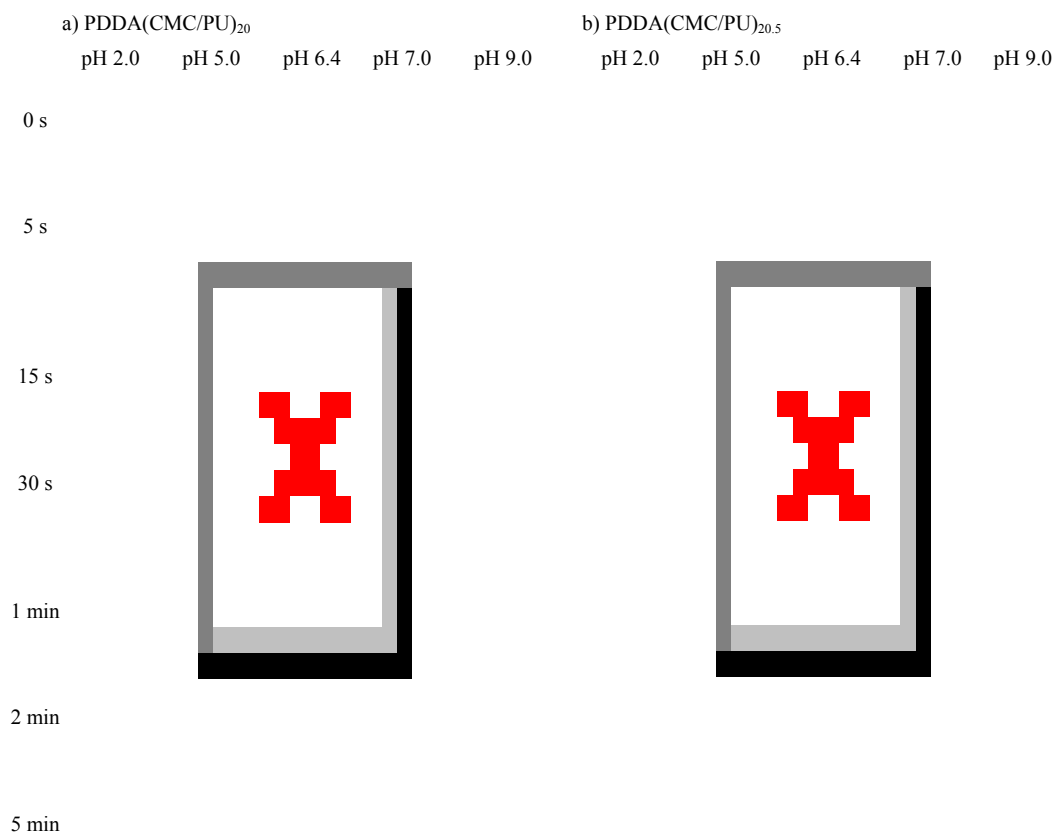

Supplement: c4ra13373k1.pdf [file c4ra13373k1.pdf]
